# Supplementary material for: Saliva Decreases Sucrose-induced Cariogenicity in an Experimental Biological Caries Model
Source: Preprints.org preprint supplement (doi:10.20944/preprints202304.0824.v1), 2023-04-24
Supplement: Supplementary file 1 [file supplementary]

**Supplementary Material**


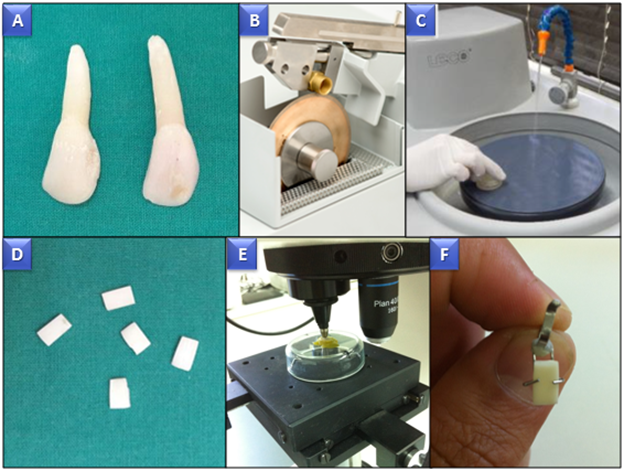


Supplementary Figure. Enamel and dentin slab preparation. A. Selected bovine incisors. B. Diamond saw used to cut bovine incisors. C. Polishing a slab in the automatic polisher. D. Dimensioned bovine enamel slabs. E. Measurement of the initial Knoop surface microhardness with the microindenter. F. Mounting an enamel slab in the holder device, secured with composite resin.
